# Supplementary material
Source: publisher figshare collection journal article supplement (https://future-science-group.figshare.com/ndownloader/files/34125942)
Supplement: Supplementary file 1 [file 34125942]

**EP Motion Biomarker A/P and Parallelism plate**

- Step 1: Dispense SM diluent (reagent transfer)
  - Number of samples: 1
  - Reagent transfer:
    - 400 uL, T1000
    - SM 🡪 A1
  - Number of samples: 2
  - Reagent transfer:
    - 250 uL, T1000
    - SM 🡪 A2, A3
  - Number of samples: 21
  - Reagent transfer:
    - 180 uL, T1000
    - SM 🡪 A4-12, B7-12, C1-6
  - Number of samples: 6
  - Reagent transfer:
    - 420 uL, T1000
    - SM 🡪 B1-6
- Step 2: Dispense AM diluent (reagent transfer)
  - Number of samples: 1
  - Reagent transfer:
    - 400 uL, T1000
    - AM 🡪 D1
  - Number of samples: 2
  - Reagent transfer:
    - 250 uL, T1000
    - AM 🡪 D2, D3
  - Number of samples: 21
  - Reagent transfer:
    - 180 uL, T1000
    - AM 🡪 D4-12, E7-12, F1-12
  - Number of samples: 6
  - Reagent transfer:
    - 420 uL, T1000
    - AM 🡪 E1-6
- Step 3: Dispense Stock into respective wells (reagent transfer), then mix
  - Number of samples: 2
  - Reagent transfer:
    - 100 uL, T1000
    - P1 H12 🡪 P1 A1, D1
  - Number of samples: 12
  - Reagent transfer:
    - 80 uL, T1000
    - P1 H12 🡪 P1 B1-6, E1-6
  - **Thermomix 15s 1000 RPM**
- Step 4: Make serial dilutions (sample transfers), mix when needed
  - Number of samples: 2
  - Sample transfer:
    - 250 uL, T1000
    - P1 A1 🡪 A2, D1 🡪 D2
  - **Thermomix**
  - Number of samples: 2
  - Sample transfer:
    - 250 uL, T1000
    - P1 A2 🡪 A3, D2 🡪 D3
  - **Thermomix**
  - Number of samples: 6
  - Sample transfer:
    - 20 uL, T50
    - P1 A1 🡪 A4, A2 🡪 A5, A3 🡪 A6, D1 🡪 D4, D2 🡪 D5, D3 🡪 D6
  - **Thermomix**
  - Number of samples: 6
  - Sample transfer:
    - 20 uL, T50
    - P1 A4 🡪 A7, A5 🡪 A8, A6 🡪 A9, D4 🡪 D7, D5 🡪 D8, D6 🡪 D9
  - **Thermomix**
  - Number of samples: 2
  - Sample transfer:
    - 20 uL, T50
    - P1 A7 🡪 A10, D7 🡪 D10
  - **Thermomix**
  - Number of samples: 12
  - Sample transfer:
    - 20 uL, T50
    - P1 B1 🡪 B7, B2 🡪 B8, B3 🡪 B9, B4 🡪 B10, B5 🡪 B11, B6 🡪 B12, E1 🡪 E7, E2 🡪 E8, E3 🡪 E9, E4 🡪 E10, E5 🡪 E11, E6 🡪 E12
  - **Thermomix**
  - Number of samples: 12
  - Sample transfer:
    - 20 uL, T50
    - P1 B7 🡪 C1, B8 🡪 C2, B9 🡪 C3, B10 🡪 C4, B11 🡪 C5, B12 🡪 C6, E7 🡪 F1, E8 🡪 F2, E9 🡪 F3, E10 🡪 F4, E11 🡪 F5, E12 🡪 F6
  - **Thermomix**
  - **End**
